# Supplementary material for: Prevalence and correlates of common mental health disorders, functioning and resilience among youth in Western Kenya. A cross-sectional study
Source: Research Square preprint supplement (doi:10.21203/rs.3.rs-6933736/v1), 2025-07-04
Supplement: Supplementary file 1 [file 0168530d90e5590e0f803bd1.docx]

**Supplementary Table 1.** **Univariable and multivariable ordinal regression model for depression levels**

| **Depression ordered** | **COR (95% CI)** | **P value** | **AOR (95% CI)** | **P value** |
| --- | --- | --- | --- | --- |
| **Age** | 1.03 (0.98–1.09) | 0.190 | ––––– |  |
| **Gender** |  |  |  |  |
| Male | Ref |  |  |  |
| Female | 0.94 (0.71–1.26) | 0.698 | ––––– |  |
| **Town** |  |  |  |  |
| Bungoma | Ref |  |  |  |
| Kitale | 0.35 (0.26–0.47) | <0.001 | 0.72 (0.50–1.04) | 0.078 |
| **Level of education** |  |  |  |  |
| Primary | Ref |  | Ref |  |
| Secondary | 2.26 (1.17–4.40) | 0.016 | 2.83 (1.41–5.73) | **0.004** |
| Tertiary | 1.14 (0.59–2.21) | 0.700 | 1.92 (0.94–3.96) | **0.073** |
| **Marital status** |  |  |  |  |
| Single | Ref |  | Ref |  |
| Married/cohabiting | 0.81 (0.59–1.12) | 0.212 | 0.64 (0.44–0.91) | **0.014** |
| Divorced/separated | 2.42 (1.15–5.15) | 0.020 | 1.84 (0.86–3.95) | 0.117 |
| **Employment status** |  |  |  |  |
| Self–employed | **Ref** |  |  |  |
| Formal employment | 0.39 (0.16–0.92) | 0.031 | **0.70 (0.28–1.72)** | 0.435 |
| Informal employment | 0.58 (0.37–0.90) | 0.016 | **0.51 (0.32–0.81)** | 0.004 |
| Full–time student | 0.42 (0.28–0.63) | <0.001 | **0.62 (0.39–1.00)** | 0.053 |
| Unemployed | 0.90 (0.62–1.30) | 0.570 | 0.58 (0.39–0.86) | 0.007 |
| **PSYCHLOPS score** | 1.26 (1.22–1.31) | <0.001 | 1.24 (1.19–1.30) | <0.001 |
