# Supplementary material for: Prevalence and correlates of common mental health disorders, functioning and resilience among youth in Western Kenya. A cross-sectional study
Source: Research Square preprint supplement (doi:10.21203/rs.3.rs-6933736/v1), 2025-07-04
Supplement: Supplementary file 2 [file 23d6f4948dfafec114c4ebfa.docx]

**Supplementary Table 3.** **Univariable and multivariable ordinal regression model for stress levels**

| **Stress ordered** | **OR (95% CI)** | **P value** | **AOR (95% CI)** | **P value** |
| --- | --- | --- | --- | --- |
| Age | 1.06 (1.01–1.12) | 0.029 | –– |  |
| **Gender** |  |  |  |  |
| Male | Ref |  |  |  |
| Female | 1.24 (0.89–1.71) | 0.199 | –– |  |
| **Town** |  |  |  |  |
| Bungoma | Ref |  |  |  |
| Kitale | 0.09 (0.05–0.13) | <0.001 | 0.15 (0.09–0.24) | **<0.001** |
| **Level of education** |  |  |  |  |
| Primary | **Ref** |  |  |  |
| Secondary | 0.88 (0.42–1.87) | 0.741 | 1.29 (0.58–2.99) | 0.538 |
| Tertiary | 0.52 (0.25–1.10) | 0.082 | 1.22 (0.53–2.88) | 0.638 |
| **Marital status** |  |  |  |  |
| Single | **Ref** |  |  |  |
| Married/cohabiting | 1.01 (0.70–1.46) | 0.942 | 0.72 (0.48–1.08) | 0.109 |
| Divorced/separated | 4.42 (1.98–10.19) | <0.001 | 3.74 (1.46–10.21) | **0.007** |
| **Employment status** |  |  |  |  |
| Self–employed | **Ref** |  |  |  |
| Formal employment | 0.33 (0.13–0.84) | 0.018 | 0.60 (0.22–1.65) | 0.321 |
| Informal employment | 0.66 (0.40–1.09) | 0.105 | 0.73 (0.43–1.23) | 0.235 |
| Full–time student | 0.39 (0.24–0.61) | <0.001 | 0.67 (0.39–1.14) | 0.142 |
| Unemployed | 1.74 (1.14–2.65) | 0.010 | 1.11 (0.70–1.75) | 0.658 |
| **PSYCHLOPS score** | 1.25 (1.20–1.30) | <0.001 | 1.16 (1.11–1.21) | **<0.001** |
