# Supplementary material for: Prevalence and correlates of common mental health disorders, functioning and resilience among youth in Western Kenya. A cross-sectional study
Source: Research Square preprint supplement (doi:10.21203/rs.3.rs-6933736/v1), 2025-07-04
Supplement: Supplementary file 3 [file 63b22fc32d7036df33594a57.docx]

**Supplementary Table 2.** **Univariable and multivariable ordinal regression model for anxiety levels**

| **Anxiety ordered** | **COR (95% CI)** | **P value** | **AOR (95% CI)** | **P value** |
| --- | --- | --- | --- | --- |
| Age | 1.07 (1.02–1.13) | 0.005 | 1.08 (1.02–1.14) | **0.011** |
| **Gender** |  |  |  |  |
| Male | Ref |  |  |  |
| Female | 0.99 (0.74–1.31) | 0.930 | –––––––––––– |  |
| **Town** |  |  |  |  |
| Bungoma | Ref |  |  |  |
| Kitale | 0.17 (0.12–0.23) | <0.001 | 0.32 (0.22–0.46) | **<0.001** |
| **Level of education** |  |  |  |  |
| Primary | **Ref** |  |  |  |
| Secondary | 1.91 (1.00–3.71) | 0.052 | 3.46 (1.73–7.05) | **<0.001** |
| Tertiary | 0.98 (0.51–1.89) | 0.940 | 2.57 (1.26–5.30) | **0.010** |
| **Marital status** |  |  |  |  |
| Single | **Ref** |  |  |  |
| Married/cohabiting | 1.21 (0.88–1.67) | 0.235 | – |  |
| Divorced/separated | 2.46 (1.15–5.28) | 0.020 | – |  |
| **Employment status** |  |  |  |  |
| Self–employed | **Ref** |  |  |  |
| Formal employment | 0.26 (0.11–0.60) | 0.002 | 0.40 (0.15–1.04) | 0.066 |
| Informal employment | 0.63 (0.41–0.97) | 0.038 | 0.78 (0.49–1.24) | 0.298 |
| Full–time student | 0.40 (0.26–0.60) | <0.001 | 1.27 (0.75–2.15) | 0.377 |
| Unemployed | 0.94(0.65–1.36) | 0.738 | 0.62 (0.41–0.91) | 0.016 |
| **PSYCHLOPS score** | 1.34 (1.29–1.40) | <0.001 | 1.29 (1.23–1.35) | **<0.001** |
