# Supplementary material for: Prevalence and correlates of common mental health disorders, functioning and resilience among youth in Western Kenya. A cross-sectional study
Source: Research Square preprint supplement (doi:10.21203/rs.3.rs-6933736/v1), 2025-07-04
Supplement: Supplementary file 4 [file 7ec726d79524575c7b192af5.docx]

**Supplementary Table 5.** **Univariable and multivariable ordinal regression model for resilience levels**

| **Resilience ordered** | **COR (95% CI)** | **P value** | **AOR (95% CI)** | **P value** |
| --- | --- | --- | --- | --- |
| Age | 0.96 (0.91–1.01) | 0.129 | ––– |  |
| **Gender** |  |  |  |  |
| Male | **Ref** |  |  |  |
| Female | 1.02 (0.75–1.40) | 0.889 | ––– |  |
| **Town** |  |  |  |  |
| Bungoma | **Ref** |  |  |  |
| Kitale | 8.73 (6.14–12.55) | <0.001 | 6.55 (4.31–10.07) | **<0.001** |
| **Level of education** |  |  |  |  |
| Primary | **Ref** |  |  |  |
| Secondary | 0.80 (0.38–1.72) | 0.566 | ––– |  |
| Tertiary | 1.45 (0.70–3.09) | 0.321 | ––– |  |
| **Marital status** |  |  |  |  |
| Single | **Ref** |  |  |  |
| Married/cohabiting | 0.89 (0.63–1.26) | 0.518 | ––– |  |
| Divorced/separated | 0.84 (0.35–1.95) | 0.683 | ––– |  |
| **Employment status** |  |  |  |  |
| Self–employed | **Ref** |  |  |  |
| Formal employment | 2.79 (1.12–7.38) | 0.032 | 1.49 (0.52–4.32) | 0.459 |
| Informal employment | 0.88 (0.55–1.42) | 0.608 | 0.57 (0.32–1.01) | 0.059 |
| Full–time student | 1.62 (1.05–2.50) | 0.030 | 0.62 (0.36–1.06) | 0.084 |
| Unemployed | 0.74 (0.49–1.12) | 0.157 | 1.19 (0.73–1.94) | 0.495 |
| **PSYCHLOPS score** | 0.79 (0.76–0.82) | <0.001 | 0.84 (0.81–0.88) | **<0.001** |
