# Supplementary material for: Prevalence and correlates of common mental health disorders, functioning and resilience among youth in Western Kenya. A cross-sectional study
Source: Research Square preprint supplement (doi:10.21203/rs.3.rs-6933736/v1), 2025-07-04
Supplement: Supplementary file 6 [file f02e78ea7ddb86cd5142effe.docx]

**Supplementary Table 4.** **Univariable and multivariable ordinal regression model for functioning limitations**

| **Disability** | **COR (95% CI)** | **P value** | **AOR (95% CI** | **P value** |
| --- | --- | --- | --- | --- |
| Age | 0.96 (0.91–1.01) | 0.111 | ––– |  |
| **Gender** |  |  |  |  |
| Male | Ref |  |  |  |
| Female | 1.36 (1.01–1.85) | 0.046 | 1.47 (1.07–2.03) | **0.017** |
| **Town** |  |  |  |  |
| Bungoma | Ref |  |  |  |
| Kitale | 2.12 (1.56–2.90) | <0.001 | 4.21 (2.89–6.18) | **<0.001** |
| **Level of education** |  |  |  |  |
| Primary | **Ref** |  |  |  |
| Secondary | 1.20 (0.57–2.55) | 0.631 | ––– |  |
| Tertiary | 1.29 (0.61–2.73) | 0.496 | ––– |  |
| **Marital status** |  |  |  |  |
| Single | **Ref** |  |  |  |
| Married/cohabiting | 0.58 (0.41–0.82) | 0.002 | 0.69 (0.48–0.99) | **0.042** |
| Divorced/separated | 2.51 (1.10–5.69) | 0.028 | 1.98 (0.84–4.66) | 0.118 |
| **Employment status** |  |  |  |  |
| Self–employed | **Ref** |  |  |  |
| Formal employment | 0.53 (0.22–1.24) | 0.140 | **–––** |  |
| Informal employment | 0.78 (0.50–1.24) | 0.299 | **–––** |  |
| Full–time student | 0.79 (0.52–1.20) | 0.274 | **–––** |  |
| Unemployed | 0.77 (0.51–1.15) | 0.204 | **–––** |  |
| **PSYCHLOPS score** | 1.07 (1.04–1.11) | <0.001 | 1.17 (1.12–1.22) | **<0.001** |
